# Supplementary material
Source: ML conference proceedings conference paper supplement (https://proceedings.neurips.cc/paper_files/paper/2020/hash/d63fbf8c3173730f82b150c5ef38b8ff-Abstract.html)
Supplement: Supplementary file [file d63fbf8c3173730f82b150c5ef38b8ff-Supplemental.pdf]

# Supplementary Material of A Matrix Chernoff Bound for Markov Chains and Its Application to Co-occurrence Matrices

## A Convergence Rate of Co-occurrence Matrices

### A.1 Proof of Claim 1

**Claim 1** (Properties of  $\mathbf{Q}$ ). *If  $\mathbf{P}$  is a regular Markov chain, then  $\mathbf{Q}$  satisfies:*

1.  $\mathbf{Q}$  is a regular Markov chain with stationary distribution  $\sigma_{(u_0, \dots, u_T)} = \pi_{u_0} \mathbf{P}_{u_0, u_1} \cdots \mathbf{P}_{u_{T-1}, u_T}$ ;
2. The sequence  $(X_1, \dots, X_{L-T})$  is a random walk on  $\mathbf{Q}$  starting from a distribution  $\rho$  such that  $\rho_{(u_0, \dots, u_T)} = \phi_{u_0} \mathbf{P}_{u_0, u_1} \cdots \mathbf{P}_{u_{T-1}, u_T}$ , and  $\|\rho\|_\sigma = \|\phi\|_\pi$ .
3.  $\forall \delta > 0$ , the  $\delta$ -mixing time of  $\mathbf{P}$  and  $\mathbf{Q}$  satisfies  $\tau(\mathbf{Q}) < \tau(\mathbf{P}) + T$ ;
4.  $\exists \mathbf{P}$  with  $\lambda(\mathbf{P}) < 1$  s.t. the induced  $\mathbf{Q}$  has  $\lambda(\mathbf{Q}) = 1$ , i.e.  $\mathbf{Q}$  may have zero spectral gap.

*Proof.* We prove the four parts of this Claim one by one.

**Part 1** To prove  $\mathbf{Q}$  is regular, it is sufficient to show that  $\exists N_1, \forall n_1 > N_1, (v_0, \dots, v_T)$  can reach  $(u_0, \dots, u_T)$  at  $n_1$  steps. We know  $\mathbf{P}$  is a regular Markov chain, so there exists  $N_2 \geq T$  s.t., for any  $n_2 \geq N_2, v_T$  can reach  $u_0$  at exact  $n_2$  step, i.e., there is a  $n_2$ -step walk s.t.  $(v_T, w_1, \dots, w_{n_2-1}, u_0)$  on  $\mathbf{P}$ . This induces an  $n_2$ -step walk from  $(v_0, \dots, v_T)$  to  $(w_{n_2-T+1}, \dots, w_{n_2-1}, u_0)$ . Take further  $T$  step, we can reach  $(u_0, \dots, u_T)$ , so we construct a  $n_1 = n_2 + T$  step walk from  $(v_0, \dots, v_T)$  to  $(u_0, \dots, u_T)$ . Since this is true for any  $n_2 \geq N_2$ , we then claim that any state can be reached from any other state in any number of steps greater than or equal to a number  $N_1 = N_2 + T$ . Next to verify  $\sigma$  such that  $\sigma_{(u_0, \dots, u_T)} = \pi_{u_0} \mathbf{P}_{u_0, u_1} \cdots \mathbf{P}_{u_{T-1}, u_T}$  is the stationary distribution of Markov chain  $\mathbf{Q}$ ,

$$\begin{aligned}
 & \sum_{(u_0, \dots, u_T) \in \mathcal{S}} \sigma_{(u_0, \dots, u_T)} \mathbf{Q}_{(u_0, \dots, u_T), (w_0, \dots, w_T)} \\
 &= \sum_{u_0: (u_0, w_0, \dots, w_{T-1}) \in \mathcal{S}} \pi_{u_0} \mathbf{P}_{u_0, w_0} \mathbf{P}_{w_0, w_1}, \dots, \mathbf{P}_{w_{T-2}, w_{T-1}} \mathbf{P}_{w_{T-1}, w_T} \\
 &= \left( \sum_{u_0} \pi_{u_0} \mathbf{P}_{u_0, w_0} \right) \mathbf{P}_{w_0, w_1}, \dots, \mathbf{P}_{w_{T-2}, w_{T-1}} \mathbf{P}_{w_{T-1}, w_T} \\
 &= \pi_{w_0} \mathbf{P}_{w_0, w_1}, \dots, \mathbf{P}_{w_{T-2}, w_{T-1}} \mathbf{P}_{w_{T-1}, w_T} = \sigma_{w_0, \dots, w_T}.
 \end{aligned}$$

**Part 2** Recall  $(v_1, \dots, v_L)$  is a random walk on  $\mathbf{P}$  starting from distribution  $\phi$ , so the probability we observe  $X_1 = (v_1, \dots, v_{T+1})$  is  $\phi_{v_1} \mathbf{P}_{v_1, v_2} \cdots \mathbf{P}_{v_T, v_{T+1}} = \rho_{(v_1, \dots, v_{T+1})}$ , i.e.,  $X_1$  is sampled from the distribution  $\rho$ . Then we study the transition probability from  $X_i = (v_i, \dots, v_{i+T})$  to  $X_{i+1} = (v_{i+1}, \dots, v_{i+T+1})$ , which is  $\mathbf{P}_{v_{i+T}, v_{i+T+1}} = \mathbf{Q}_{X_i, X_{i+1}}$ . Consequently, we can claim  $(X_i, \dots, X_{L-T})$  is a random walk on  $\mathbf{Q}$ . Moreover,

$$\begin{aligned}
 \|\rho\|_\sigma^2 &= \sum_{(u_0, \dots, u_T) \in \mathcal{S}} \frac{\rho_{(u_0, \dots, u_T)}^2}{\sigma_{(u_0, \dots, u_T)}} = \sum_{(u_0, \dots, u_T) \in \mathcal{S}} \frac{(\phi_{u_0} \mathbf{P}_{u_0, u_1} \cdots \mathbf{P}_{u_{T-1}, u_T})^2}{\pi_{u_0} \mathbf{P}_{u_0, u_1} \cdots \mathbf{P}_{u_{T-1}, u_T}} \\
 &= \sum_{u_0} \frac{\phi_{u_0}^2}{\pi_{u_0}} \sum_{(u_0, u_1, \dots, u_T) \in \mathcal{S}} \mathbf{P}_{u_0, u_1} \cdots \mathbf{P}_{u_{T-1}, u_T} = \sum_{u_0} \frac{\phi_{u_0}^2}{\pi_{u_0}} = \|\phi\|_\pi^2,
 \end{aligned}$$

which implies  $\|\rho\|_\sigma = \|\phi\|_\pi$ .

**Part 3** For any distribution  $\mathbf{y}$  on  $\mathcal{S}$ , define  $\mathbf{x} \in \mathbb{R}^n$  such that  $x_i = \sum_{(v_1, \dots, v_{T-1}, i) \in \mathcal{S}} y_{v_1, \dots, v_{T-1}, i}$ . Easy to see  $\mathbf{x}$  is a probability vector, since  $\mathbf{x}$  is the marginal probability of  $\mathbf{y}$ . For convenience, we

assume for a moment the  $\mathbf{x}, \mathbf{y}, \boldsymbol{\sigma}, \boldsymbol{\pi}$  are row vectors. We can see that:

$$\begin{aligned}
\|\mathbf{y}\mathbf{Q}^{\tau(\mathbf{P})+T-1} - \boldsymbol{\sigma}\|_{TV} &= \frac{1}{2} \|\mathbf{y}\mathbf{Q}^{\tau(\mathbf{P})+T-1} - \boldsymbol{\sigma}\|_1 \\
&= \frac{1}{2} \sum_{(v_1, \dots, v_T) \in \mathcal{S}} \left| \left( \mathbf{y}\mathbf{Q}^{\tau(\mathbf{P})+T-1} - \boldsymbol{\sigma} \right)_{v_1, \dots, v_T} \right| \\
&= \frac{1}{2} \sum_{(v_1, \dots, v_T) \in \mathcal{S}} \left| \left( \mathbf{x}\mathbf{P}^{\tau(\mathbf{P})} \right)_{v_1} \mathbf{P}_{v_1, v_2} \cdots \mathbf{P}_{v_{T-1}, v_T} - \pi_{v_1} \mathbf{P}_{v_1, v_2} \cdots \mathbf{P}_{v_{T-1}, v_T} \right| \\
&= \frac{1}{2} \sum_{(v_1, \dots, v_T) \in \mathcal{S}} \left| \left( \mathbf{x}\mathbf{P}^{\tau(\mathbf{P})} \right)_{v_1} - \pi_{v_1} \right| \mathbf{P}_{v_1, v_2} \cdots \mathbf{P}_{v_{T-1}, v_T} \\
&= \frac{1}{2} \sum_{v_1} \left| \left( \mathbf{x}\mathbf{P}^{\tau(\mathbf{P})} \right)_{v_1} - \pi_{v_1} \right| \sum_{(v_1, \dots, v_T) \in \mathcal{S}} \mathbf{P}_{v_1, v_2} \cdots \mathbf{P}_{v_{T-1}, v_T} \\
&= \frac{1}{2} \sum_{v_1} \left| \left( \mathbf{x}\mathbf{P}^{\tau(\mathbf{P})} \right)_{v_1} - \pi_{v_1} \right| = \frac{1}{2} \|\mathbf{x}\mathbf{P}^{\tau(\mathbf{P})} - \boldsymbol{\pi}\|_1 = \|\mathbf{x}\mathbf{P}^{\tau(\mathbf{P})} - \boldsymbol{\pi}\|_{TV} \leq \delta.
\end{aligned}$$

which indicates  $\tau(\mathbf{Q}) \leq \tau(\mathbf{P}) + T - 1 < \tau(\mathbf{P}) + T$ .

**Part 4** This is an example showing that  $\lambda(\mathbf{Q})$  cannot be bounded by  $\lambda(\mathbf{P})$  — even though  $\mathbf{P}$  has  $\lambda(\mathbf{P}) < 1$ , the induced  $\mathbf{Q}$  may have  $\lambda(\mathbf{Q}) = 1$ . We consider random walk on the unweighted undirected graph  and  $T = 1$ . The transition probability matrix  $\mathbf{P}$  is:

$$\mathbf{P} = \begin{bmatrix} 0 & 1/3 & 1/3 & 1/3 \\ 1/2 & 0 & 1/2 & 0 \\ 1/3 & 1/3 & 0 & 1/3 \\ 1/2 & 0 & 1/2 & 0 \end{bmatrix}$$

with stationary distribution  $\boldsymbol{\pi} = [0.3 \ 0.2 \ 0.3 \ 0.2]^\top$  and  $\lambda(\mathbf{P}) = \frac{2}{3}$ . When  $T = 1$ , the induced Markov chain  $\mathbf{Q}$  has stationary distribution  $\sigma_{u,v} = \pi_u \mathbf{P}_{u,v} = \frac{d_u}{2m} \frac{1}{d_u} = \frac{1}{2m}$  where  $m = 5$  is the number of edges in the graph. Construct  $\mathbf{y} \in \mathbb{R}^{|\mathcal{S}|}$  such that

$$\mathbf{y}_{(u,v)} = \begin{cases} 1 & (u,v) = (0,1), \\ -1 & (u,v) = (0,3), \\ 0 & \text{otherwise.} \end{cases}$$

The constructed vector  $\mathbf{y}$  has norm

$$\|\mathbf{y}\|_\sigma = \sqrt{\langle \mathbf{y}, \mathbf{y} \rangle_\sigma} = \sqrt{\sum_{(u,v) \in \mathcal{S}} \frac{\mathbf{y}_{(u,v)} \mathbf{y}_{(u,v)}}{\sigma_{(u,v)}}} = \sqrt{\frac{\mathbf{y}_{(0,1)} \mathbf{y}_{(0,1)}}{\sigma_{(0,1)}} + \frac{\mathbf{y}_{(0,3)} \mathbf{y}_{(0,3)}}{\sigma_{(0,3)}}} = 2\sqrt{m}.$$

And it is easy to check  $\mathbf{y} \perp \boldsymbol{\sigma}$ , since  $\langle \mathbf{y}, \boldsymbol{\sigma} \rangle_\sigma = \sum_{(u,v) \in \mathcal{S}} \frac{\sigma_{(u,v)} \mathbf{y}_{(u,v)}}{\sigma_{(u,v)}} = \mathbf{y}_{(0,1)} + \mathbf{y}_{(0,3)} = 0$ . Let  $\mathbf{x} = (\mathbf{y}^* \mathbf{Q})^*$ , we have for  $(u,v) \in \mathcal{S}$ :

$$\mathbf{x}_{(u,v)} = \begin{cases} 1 & (u,v) = (1,2), \\ -1 & (u,v) = (3,2), \\ 0 & \text{otherwise.} \end{cases}$$

This vector has norm:

$$\|\mathbf{x}\|_\sigma = \sqrt{\langle \mathbf{x}, \mathbf{x} \rangle_\sigma} = \sqrt{\sum_{(u,v) \in \mathcal{S}} \frac{\mathbf{x}_{(u,v)} \mathbf{x}_{(u,v)}}{\sigma_{(u,v)}}} = \sqrt{\frac{\mathbf{y}_{(1,2)} \mathbf{y}_{(1,2)}}{\sigma_{(1,2)}} + \frac{\mathbf{y}_{(3,2)} \mathbf{y}_{(3,2)}}{\sigma_{(3,2)}}} = 2\sqrt{m}$$

Thus we have  $\frac{\|(\mathbf{y}^* \mathbf{Q})^*\|_\sigma}{\|\mathbf{y}\|_\sigma} = 1$ . Taking maximum over all possible  $\mathbf{y}$  gives  $\lambda(\mathbf{Q}) \geq 1$ . Also note that fact that  $\lambda(\mathbf{Q}) \leq 1$ , so  $\lambda(\mathbf{Q}) = 1$ .  $\square$

## A.2 Proof of Claim 2

**Claim 2** (Properties of  $f$ ). *The function  $f$  in Equation 2 satisfies (1)  $\sum_{X \in \mathcal{S}} \sigma_X f(X) = 0$ ; (2)  $f(X)$  is symmetric and  $\|f(X)\|_2 \leq 1, \forall X \in \mathcal{S}$ .*

*Proof.* Note that Equation 2 is indeed a random value minus its expectation, so naturally Equation 2 has zero mean, i.e.,  $\sum_{X \in \mathcal{S}} \sigma_X f(X) = 0$ . Moreover,  $\|f(X)\|_2 \leq 1$  because

$$\begin{aligned} \|f(X)\|_2 &\leq \frac{1}{2} \left( \sum_{r=1}^T \frac{|\alpha_r|}{2} \left( \|e_{v_0} e_{v_r}^\top\|_2 + \|e_{v_r} e_{v_0}^\top\|_2 \right) + \sum_{r=1}^T \frac{|\alpha_r|}{2} \left( \|\mathbf{\Pi}\|_2 \|\mathbf{P}\|_2^r + \|\mathbf{P}^\top\|_2^r \|\mathbf{\Pi}\|_2 \right) \right) \\ &\leq \frac{1}{2} \left( \sum_{r=1}^T |\alpha_r| + \sum_{r=1}^T |\alpha_r| \right) = 1. \end{aligned}$$

where the first step follows triangle inequality and submultiplicativity of 2-norm, and the third step follows by (1)  $\|e_i e_j^\top\|_2 = 1$ ; (2)  $\|\mathbf{\Pi}\|_2 = \|\text{diag}(\boldsymbol{\pi})\|_2 \leq 1$  for distribution  $\boldsymbol{\pi}$ ; (3)  $\|\mathbf{P}\|_2 = \|\mathbf{P}^\top\|_2 = 1$ .  $\square$

### A.3 Proof of Corollary 1

**Corollary 1** (Co-occurrence Matrices of HMMs). *For a HMM with observable states  $y_t \in \mathcal{Y}$  and hidden states  $x_t \in \mathcal{X}$ , let  $P(y_t|x_t)$  be the emission probability and  $P(x_{t+1}|x_t)$  be the hidden state transition probability. Given an  $L$ -step trajectory observations from the HMM,  $(y_1, \dots, y_L)$ , one needs a trajectory of length  $L = O(\tau(\log |\mathcal{Y}| + \log \tau)/\epsilon^2)$  to achieve a co-occurrence matrix within error bound  $\epsilon$  with high probability, where  $\tau$  is the mixing time of the Markov chain on hidden states.*

*Proof.* A HMM can be model by a Markov chain  $\mathbf{P}$  on  $\mathcal{Y} \times \mathcal{X}$  such that  $P(y_{t+1}, x_{t+1}|y_t, x_t) = P(y_{t+1}|x_{t+1})P(x_{t+1}|x_t)$ . For the co-occurrence matrix of observable states, applying a similar proof like our Theorem 2 shows that one needs a trajectory of length  $O(\tau(\mathbf{P})(\log |\mathcal{Y}| + \log \tau(\mathbf{P}))/\epsilon^2)$  to achieve error bound  $\epsilon$  with high probability. Moreover, the mixing time  $\tau(\mathbf{P})$  is bounded by the mixing time of the Markov chain on the hidden state space (i.e.,  $P(x_{t+1}|x_t)$ ).  $\square$

## B Matrix Chernoff Bounds for Markov Chains

### B.1 Preliminaries

**Kronecker Products** If  $\mathbf{A}$  is an  $M_1 \times N_1$  matrix and  $\mathbf{B}$  is a  $M_2 \times N_2$  matrix, then the Kronecker product  $\mathbf{A} \otimes \mathbf{B}$  is the  $M_2 M_1 \times N_1 N_2$  block matrix such that

$$\mathbf{A} \otimes \mathbf{B} = \begin{bmatrix} \mathbf{A}_{1,1} \mathbf{B} & \cdots & \mathbf{A}_{1,N_1} \mathbf{B} \\ \vdots & \ddots & \vdots \\ \mathbf{A}_{M_1,1} \mathbf{B} & \cdots & \mathbf{A}_{M_1,N_1} \mathbf{B} \end{bmatrix}.$$

Kronecker product has the mixed-product property. If  $\mathbf{A}, \mathbf{B}, \mathbf{C}, \mathbf{D}$  are matrices of such size that one can form the matrix products  $\mathbf{AC}$  and  $\mathbf{BD}$ , then  $(\mathbf{A} \otimes \mathbf{B})(\mathbf{C} \otimes \mathbf{D}) = (\mathbf{AC}) \otimes (\mathbf{BD})$ .

**Vectorization** For a matrix  $\mathbf{X} \in \mathbb{C}^{d \times d}$ ,  $\text{vec}(\mathbf{X}) \in \mathbb{C}^{d^2}$  denote the vectorization of the matrix  $\mathbf{X}$ , s.t.  $\text{vec}(\mathbf{X}) = \sum_{i \in [d]} \sum_{j \in [d]} \mathbf{X}_{i,j} e_i \otimes e_j$ , which is the stack of rows of  $\mathbf{X}$ . And there is a relationship between matrix multiplication and Kronecker product s.t.  $\text{vec}(\mathbf{AXB}) = (\mathbf{A} \otimes \mathbf{B}^\top) \text{vec}(\mathbf{X})$ .

**Matrices and Norms** For a matrix  $\mathbf{A} \in \mathbb{C}^{N \times N}$ , we use  $\mathbf{A}^\top$  to denote matrix transpose, use  $\overline{\mathbf{A}}$  to denote entry-wise matrix conjugation, use  $\mathbf{A}^*$  to denote matrix conjugate transpose ( $\mathbf{A}^* = \overline{\mathbf{A}^\top} = \overline{\mathbf{A}}^\top$ ). The vector 2-norm is defined to be  $\|\mathbf{x}\|_2 = \sqrt{\mathbf{x}^* \mathbf{x}}$ , and the matrix 2-norm is defined to be  $\|\mathbf{A}\|_2 = \max_{\mathbf{x} \in \mathbb{C}^N, \mathbf{x} \neq 0} \frac{\|\mathbf{Ax}\|_2}{\|\mathbf{x}\|_2}$ .

We then recall the definition of inner-product under  $\boldsymbol{\pi}$ -kernel in Section 2. The inner-product under  $\boldsymbol{\pi}$ -kernel for  $\mathbb{C}^N$  is  $\langle \mathbf{x}, \mathbf{y} \rangle_\boldsymbol{\pi} = \mathbf{y}^* \mathbf{\Pi}^{-1} \mathbf{x}$  where  $\mathbf{\Pi} = \text{diag}(\boldsymbol{\pi})$ , and its induced  $\boldsymbol{\pi}$ -norm  $\|\mathbf{x}\|_\boldsymbol{\pi} = \sqrt{\langle \mathbf{x}, \mathbf{x} \rangle_\boldsymbol{\pi}}$ . The above definition allow us to define a inner product under  $\boldsymbol{\pi}$ -kernel on  $\mathbb{C}^{Nd^2}$ :

**Definition 1.** Define inner product on  $\mathbb{C}^{Nd^2}$  under  $\boldsymbol{\pi}$ -kernel to be  $\langle \mathbf{x}, \mathbf{y} \rangle_\boldsymbol{\pi} = \mathbf{y}^* (\mathbf{\Pi}^{-1} \otimes \mathbf{I}_{d^2}) \mathbf{x}$ .

**Remark 1.** For  $\mathbf{x}, \mathbf{y} \in \mathbb{C}^N$  and  $\mathbf{p}, \mathbf{q} \in \mathbb{C}^{d^2}$ , then inner product (under  $\boldsymbol{\pi}$ -kernel) between  $\mathbf{x} \otimes \mathbf{p}$  and  $\mathbf{y} \otimes \mathbf{q}$  can be simplified as

$$\langle \mathbf{x} \otimes \mathbf{p}, \mathbf{y} \otimes \mathbf{q} \rangle_\boldsymbol{\pi} = (\mathbf{y} \otimes \mathbf{q})^* (\mathbf{\Pi}^{-1} \otimes \mathbf{I}_{d^2}) (\mathbf{x} \otimes \mathbf{p}) = (\mathbf{y}^* \mathbf{\Pi}^{-1} \mathbf{x}) \otimes (\mathbf{q}^* \mathbf{p}) = \langle \mathbf{x}, \mathbf{y} \rangle_\boldsymbol{\pi} \langle \mathbf{p}, \mathbf{q} \rangle.$$

**Remark 2.** The induced  $\pi$ -norm is  $\|\mathbf{x}\|_\pi = \sqrt{\langle \mathbf{x}, \mathbf{x} \rangle_\pi}$ . When  $\mathbf{x} = \mathbf{y} \otimes \mathbf{w}$ , the  $\pi$ -norm can be simplified to be:  $\|\mathbf{x}\|_\pi = \sqrt{\langle \mathbf{y} \otimes \mathbf{w}, \mathbf{y} \otimes \mathbf{w} \rangle_\pi} = \sqrt{\langle \mathbf{y}, \mathbf{y} \rangle_\pi \langle \mathbf{w}, \mathbf{w} \rangle} = \|\mathbf{y}\|_\pi \|\mathbf{w}\|_2$ .

**Matrix Exponential** The matrix exponential of a matrix  $\mathbf{A} \in \mathbb{C}^{d \times d}$  is defined by Taylor expansion  $\exp(\mathbf{A}) = \sum_{j=0}^{+\infty} \frac{\mathbf{A}^j}{j!}$ . And we will use the fact that  $\exp(\mathbf{A}) \otimes \exp(\mathbf{B}) = \exp(\mathbf{A} \otimes \mathbf{I} + \mathbf{I} \otimes \mathbf{B})$ .

**Golden-Thompson Inequality** We need the following multi-matrix Golden-Thompson inequality from Garg et al. [10].

**Theorem 4** (Multi-matrix Golden-Thompson Inequality, Theorem 1.5 in [10]). *Let  $\mathbf{H}_1, \dots, \mathbf{H}_k$  be  $k$  Hermitian matrices, then for some probability distribution  $\mu$  on  $[-\frac{\pi}{2}, \frac{\pi}{2}]$ .*

$$\log \left( \text{Tr} \left[ \exp \left( \sum_{j=1}^k \mathbf{H}_j \right) \right] \right) \leq \frac{4}{\pi} \int_{-\frac{\pi}{2}}^{\frac{\pi}{2}} \log \left( \text{Tr} \left[ \prod_{j=1}^k \exp \left( \frac{e^{i\phi}}{2} \mathbf{H}_j \right) \prod_{j=k}^1 \exp \left( \frac{e^{-i\phi}}{2} \mathbf{H}_j \right) \right] \right) d\mu(\phi).$$

## B.2 Proof of Theorem 3

**Theorem 3** (A Real-Valued Version of Theorem 1). *Let  $\mathbf{P}$  be a regular Markov chain with state space  $[N]$ , stationary distribution  $\pi$  and spectral expansion  $\lambda$ . Let  $f : [N] \rightarrow \mathbb{R}^{d \times d}$  be a function such that (1)  $\forall v \in [N]$ ,  $f(v)$  is symmetric and  $\|f(v)\|_2 \leq 1$ ; (2)  $\sum_{v \in [N]} \pi_v f(v) = \mathbf{0}$ . Let  $(v_1, \dots, v_k)$  denote a  $k$ -step random walk on  $\mathbf{P}$  starting from a distribution  $\phi$  on  $[N]$ . Then given  $\epsilon \in (0, 1)$ ,*

$$\begin{aligned} \mathbb{P} \left[ \lambda_{\max} \left( \frac{1}{k} \sum_{j=1}^k f(v_j) \right) \geq \epsilon \right] &\leq \|\phi\|_\pi d^2 \exp(-(\epsilon^2(1-\lambda)k/72)) \\ \mathbb{P} \left[ \lambda_{\min} \left( \frac{1}{k} \sum_{j=1}^k f(v_j) \right) \leq -\epsilon \right] &\leq \|\phi\|_\pi d^2 \exp(-(\epsilon^2(1-\lambda)k/72)). \end{aligned}$$

*Proof.* Due to symmetry, it suffices to prove one of the statements. Let  $t > 0$  be a parameter to be chosen later. Then

$$\begin{aligned} \mathbb{P} \left[ \lambda_{\max} \left( \frac{1}{k} \sum_{j=1}^k f(v_j) \right) \geq \epsilon \right] &= \mathbb{P} \left[ \lambda_{\max} \left( \sum_{j=1}^k f(v_j) \right) \geq k\epsilon \right] \\ &\leq \mathbb{P} \left[ \text{Tr} \left[ \exp \left( t \sum_{j=1}^k f(v_j) \right) \right] \geq \exp(tk\epsilon) \right] \\ &\leq \frac{\mathbb{E}_{v_1, \dots, v_k} \left[ \text{Tr} \left[ \exp \left( t \sum_{j=1}^k f(v_j) \right) \right] \right]}{\exp(tk\epsilon)}. \end{aligned} \quad (3)$$

The second inequality follows Markov inequality.

Next to bound  $\mathbb{E}_{v_1, \dots, v_k} \left[ \text{Tr} \left[ \exp \left( t \sum_{j=1}^k f(v_j) \right) \right] \right]$ . Using Theorem 4, we have:

$$\begin{aligned} \log \left( \text{Tr} \left[ \exp \left( t \sum_{j=1}^k f(v_j) \right) \right] \right) &\leq \frac{4}{\pi} \int_{-\frac{\pi}{2}}^{\frac{\pi}{2}} \log \left( \text{Tr} \left[ \prod_{j=1}^k \exp \left( \frac{e^{i\phi}}{2} t f(v_j) \right) \prod_{j=k}^1 \exp \left( \frac{e^{-i\phi}}{2} t f(v_j) \right) \right] \right) d\mu(\phi) \\ &\leq \frac{4}{\pi} \log \int_{-\frac{\pi}{2}}^{\frac{\pi}{2}} \text{Tr} \left[ \prod_{j=1}^k \exp \left( \frac{e^{i\phi}}{2} t f(v_j) \right) \prod_{j=k}^1 \exp \left( \frac{e^{-i\phi}}{2} t f(v_j) \right) \right] d\mu(\phi), \end{aligned}$$

where the second step follows by concavity of log function and the fact that  $\mu(\phi)$  is a probability distribution on  $[-\frac{\pi}{2}, \frac{\pi}{2}]$ . This implies

$$\text{Tr} \left[ \exp \left( t \sum_{j=1}^k f(v_j) \right) \right] \leq \left( \int_{-\frac{\pi}{2}}^{\frac{\pi}{2}} \text{Tr} \left[ \prod_{j=1}^k \exp \left( \frac{e^{i\phi}}{2} t f(v_j) \right) \prod_{j=k}^1 \exp \left( \frac{e^{-i\phi}}{2} t f(v_j) \right) \right] d\mu(\phi) \right)^{\frac{4}{\pi}}.$$

Note that  $\|\mathbf{x}\|_p \leq d^{1/p-1} \|\mathbf{x}\|_1$  for  $p \in (0, 1)$ , choosing  $p = \pi/4$  we have

$$\left( \text{Tr} \left[ \exp \left( \frac{\pi}{4} t \sum_{j=1}^k f(v_j) \right) \right] \right)^{\frac{4}{\pi}} \leq d^{\frac{4}{\pi}-1} \text{Tr} \left[ \exp \left( t \sum_{j=1}^k f(v_j) \right) \right].$$

Combining the above two equations together, we have

$$\mathrm{Tr} \left[ \exp \left( \frac{\pi}{4} t \sum_{j=1}^k f(v_j) \right) \right] \leq d^{1-\frac{\pi}{4}} \int_{-\frac{\pi}{2}}^{\frac{\pi}{2}} \mathrm{Tr} \left[ \prod_{j=1}^k \exp \left( \frac{e^{i\phi}}{2} t f(v_j) \right) \prod_{j=k}^1 \exp \left( \frac{e^{-i\phi}}{2} t f(v_j) \right) \right] d\mu(\phi). \quad (4)$$

Write  $e^{i\phi} = \gamma + ib$  with  $\gamma^2 + b^2 = |\gamma + ib|^2 = |e^{i\phi}|^2 = 1$ :

**Lemma 1** (Analogous to Lemma 4.3 in [10]). *Let  $\mathbf{P}$  be a regular Markov chain with state space  $[N]$  with spectral expansion  $\lambda$ . Let  $f$  be a function  $f : [N] \rightarrow \mathbb{R}^{d \times d}$  such that (1)  $\sum_{v \in [N]} \pi_v f(v) = 0$ ; (2)  $\|f(v)\|_2 \leq 1$  and  $f(v)$  is symmetric,  $v \in [N]$ . Let  $(v_1, \dots, v_k)$  denote a  $k$ -step random walk on  $\mathbf{P}$  starting from a distribution  $\phi$  on  $[N]$ . Then for any  $t > 0, \gamma \geq 0, b > 0$  such that  $t^2(\gamma^2 + b^2) \leq 1$  and  $t\sqrt{\gamma^2 + b^2} \leq \frac{1-\lambda}{4\lambda}$ , we have*

$$\mathbb{E} \left[ \mathrm{Tr} \left[ \prod_{j=1}^k \exp \left( \frac{tf(v_j)(\gamma + ib)}{2} \right) \prod_{j=k}^1 \exp \left( \frac{tf(v_j)(\gamma - ib)}{2} \right) \right] \right] \leq \|\phi\|_{\pi} d \exp \left( kt^2(\gamma^2 + b^2) \left( 1 + \frac{8}{1-\lambda} \right) \right).$$

Assuming the above lemma, we can complete the proof of the theorem as:

$$\begin{aligned} & \mathbb{E}_{v_1, \dots, v_k} \left[ \mathrm{Tr} \left[ \exp \left( \frac{\pi}{4} t \sum_{j=1}^k f(v_j) \right) \right] \right] \\ & \leq d^{1-\frac{\pi}{4}} \mathbb{E}_{v_1, \dots, v_k} \left[ \int_{-\frac{\pi}{2}}^{\frac{\pi}{2}} \left( \mathrm{Tr} \left[ \prod_{j=1}^k \exp \left( \frac{e^{i\phi}}{2} t f(v_j) \right) \prod_{j=k}^1 \exp \left( \frac{e^{-i\phi}}{2} t f(v_j) \right) \right) \right] d\mu(\phi) \right] \\ & = d^{1-\frac{\pi}{4}} \int_{-\frac{\pi}{2}}^{\frac{\pi}{2}} \mathbb{E}_{v_1, \dots, v_k} \left[ \mathrm{Tr} \left[ \prod_{j=1}^k \exp \left( \frac{e^{i\phi}}{2} t f(v_j) \right) \prod_{j=k}^1 \exp \left( \frac{e^{-i\phi}}{2} t f(v_j) \right) \right] \right] d\mu(\phi) \quad (5) \\ & \leq d^{1-\frac{\pi}{4}} \int_{-\frac{\pi}{2}}^{\frac{\pi}{2}} \|\phi\|_{\pi} d \exp \left( kt^2 |e^{i\phi}|^2 \left( 1 + \frac{8}{1-\lambda} \right) \right) d\mu(\phi) \\ & = \|\phi\|_{\pi} d^{2-\frac{\pi}{4}} \exp \left( kt^2 \left( 1 + \frac{8}{1-\lambda} \right) \right) \int_{-\frac{\pi}{2}}^{\frac{\pi}{2}} d\mu(\phi) \\ & = \|\phi\|_{\pi} d^{2-\frac{\pi}{4}} \exp \left( kt^2 \left( 1 + \frac{8}{1-\lambda} \right) \right) \end{aligned}$$

where the first step follows Equation 4, the second step follows by swapping  $\mathbb{E}$  and  $\int$ , the third step follows by Lemma 1, the fourth step follows by  $|e^{i\phi}| = 1$ , and the last step follows by  $\mu$  is a probability distribution on  $[-\frac{\pi}{2}, \frac{\pi}{2}]$  so  $\int_{-\frac{\pi}{2}}^{\frac{\pi}{2}} d\mu(\phi) = 1$

Finally, putting it all together:

$$\begin{aligned} \mathbb{P} \left[ \lambda_{\max} \left( \frac{1}{k} \sum_{j=1}^k f(v_j) \right) \geq \epsilon \right] & \leq \frac{\mathbb{E} \left[ \mathrm{Tr} \left[ \exp \left( t \sum_{j=1}^k f(v_j) \right) \right] \right]}{\exp(tk\epsilon)} \\ & = \frac{\mathbb{E} \left[ \mathrm{Tr} \left[ \exp \left( \frac{\pi}{4} \left( \frac{4}{\pi} t \right) \sum_{j=1}^k f(v_j) \right) \right] \right]}{\exp(tk\epsilon)} \\ & \leq \frac{\|\phi\|_{\pi} d^{2-\frac{\pi}{4}} \exp \left( k \left( \frac{4}{\pi} t \right)^2 \left( 1 + \frac{8}{1-\lambda} \right) \right)}{\exp(tk\epsilon)} \\ & = \|\phi\|_{\pi} d^{2-\frac{\pi}{4}} \exp \left( \left( \frac{4}{\pi} \right)^2 k \epsilon^2 (1-\lambda)^2 \frac{1}{36^2} \frac{9}{1-\lambda} - k \frac{(1-\lambda)\epsilon}{36} \right) \\ & \leq \|\phi\|_{\pi} d^2 \exp(-k\epsilon^2(1-\lambda)/72). \end{aligned}$$

where the first step follows by Equation 3, the second step follows by Equation 5, the third step follows by choosing  $t = (1-\lambda)\epsilon/36$ . The only thing to check is that  $t = (1-\lambda)\epsilon/36$  satisfies  $t\sqrt{\gamma^2 + b^2} = t \leq \frac{1-\lambda}{4\lambda}$ . Recall that  $\epsilon < 1$  and  $\lambda \leq 1$ , we have  $t = \frac{(1-\lambda)\epsilon}{36} \leq \frac{1-\lambda}{4} \leq \frac{1-\lambda}{4\lambda}$ .  $\square$

### B.3 Proof of Lemma 1

**Lemma 1** (Analogous to Lemma 4.3 in [10]). *Let  $\mathbf{P}$  be a regular Markov chain with state space  $[N]$  with spectral expansion  $\lambda$ . Let  $f$  be a function  $f : [N] \rightarrow \mathbb{R}^{d \times d}$  such that (1)  $\sum_{v \in [N]} \pi_v f(v) = 0$ ; (2)  $\|f(v)\|_2 \leq 1$  and  $f(v)$  is symmetric,  $v \in [N]$ . Let  $(v_1, \dots, v_k)$  denote a  $k$ -step random walk on  $\mathbf{P}$  starting from a distribution  $\phi$  on  $[N]$ . Then for any  $t > 0, \gamma \geq 0, b > 0$  such that  $t^2(\gamma^2 + b^2) \leq 1$  and  $t\sqrt{\gamma^2 + b^2} \leq \frac{1-\lambda}{4\lambda}$ , we have*

$$\mathbb{E} \left[ \text{Tr} \left[ \prod_{j=1}^k \exp \left( \frac{tf(v_j)(\gamma + ib)}{2} \right) \prod_{j=k}^1 \exp \left( \frac{tf(v_j)(\gamma - ib)}{2} \right) \right] \right] \leq \|\phi\|_{\pi} d \exp \left( kt^2(\gamma^2 + b^2) \left( 1 + \frac{8}{1-\lambda} \right) \right).$$

*Proof.* Note that for  $\mathbf{A}, \mathbf{B} \in \mathbb{C}^{d \times d}$ ,  $\langle (\mathbf{A} \otimes \mathbf{B}) \text{vec}(\mathbf{I}_d), \text{vec}(\mathbf{I}_d) \rangle = \text{Tr} [\mathbf{A}\mathbf{B}^{\top}]$ . By letting  $\mathbf{A} = \prod_{j=1}^k \exp \left( \frac{tf(v_j)(\gamma + ib)}{2} \right)$  and  $\mathbf{B} = \left( \prod_{j=k}^1 \exp \left( \frac{tf(v_j)(\gamma - ib)}{2} \right) \right)^{\top} = \prod_{j=1}^k \exp \left( \frac{tf(v_j)(\gamma - ib)}{2} \right)$ . The trace term in LHS of Lemma 1 becomes

$$\begin{aligned} & \text{Tr} \left[ \prod_{j=1}^k \exp \left( \frac{tf(v_j)(\gamma + ib)}{2} \right) \prod_{j=k}^1 \exp \left( \frac{tf(v_j)(\gamma - ib)}{2} \right) \right] \\ &= \left\langle \left( \prod_{j=1}^k \exp \left( \frac{tf(v_j)(\gamma + ib)}{2} \right) \otimes \prod_{j=1}^k \exp \left( \frac{tf(v_j)(\gamma - ib)}{2} \right) \right) \text{vec}(\mathbf{I}_d), \text{vec}(\mathbf{I}_d) \right\rangle. \end{aligned} \quad (6)$$

By iteratively applying  $(\mathbf{A} \otimes \mathbf{B})(\mathbf{C} \otimes \mathbf{D}) = (\mathbf{A}\mathbf{C}) \otimes (\mathbf{B}\mathbf{D})$ , we have

$$\begin{aligned} & \prod_{j=1}^k \exp \left( \frac{tf(v_j)(\gamma + ib)}{2} \right) \otimes \prod_{j=1}^k \exp \left( \frac{tf(v_j)(\gamma - ib)}{2} \right) \\ &= \prod_{j=1}^k \left( \exp \left( \frac{tf(v_j)(\gamma + ib)}{2} \right) \otimes \exp \left( \frac{tf(v_j)(\gamma - ib)}{2} \right) \right) \triangleq \prod_{j=1}^k \mathbf{M}_{v_j}, \end{aligned}$$

where we define

$$\mathbf{M}_{v_j} \triangleq \exp \left( \frac{tf(v_j)(\gamma + ib)}{2} \right) \otimes \exp \left( \frac{tf(v_j)(\gamma - ib)}{2} \right). \quad (7)$$

Plug it to the trace term, we have

$$\text{Tr} \left[ \prod_{j=1}^k \exp \left( \frac{tf(v_j)(\gamma + ib)}{2} \right) \prod_{j=k}^1 \exp \left( \frac{tf(v_j)(\gamma - ib)}{2} \right) \right] = \left\langle \left( \prod_{j=1}^k \mathbf{M}_{v_j} \right) \text{vec}(\mathbf{I}_d), \text{vec}(\mathbf{I}_d) \right\rangle.$$

Next, taking expectation on Equation 6 gives

$$\begin{aligned} & \mathbb{E}_{v_1, \dots, v_k} \left[ \text{Tr} \left[ \prod_{j=1}^k \exp \left( \frac{tf(v_j)(\gamma + ib)}{2} \right) \prod_{j=k}^1 \exp \left( \frac{tf(v_j)(\gamma - ib)}{2} \right) \right] \right] \\ &= \mathbb{E}_{v_1, \dots, v_k} \left[ \left\langle \left( \prod_{j=1}^k \mathbf{M}_{v_j} \right) \text{vec}(\mathbf{I}_d), \text{vec}(\mathbf{I}_d) \right\rangle \right] \\ &= \left\langle \mathbb{E}_{v_1, \dots, v_k} \left[ \prod_{j=1}^k \mathbf{M}_{v_j} \right] \text{vec}(\mathbf{I}_d), \text{vec}(\mathbf{I}_d) \right\rangle. \end{aligned} \quad (8)$$

We turn to study  $\mathbb{E}_{v_1, \dots, v_k} \left[ \prod_{j=1}^k \mathbf{M}_{v_j} \right]$ , which is characterized by the following lemma:

**Lemma 2.** *Let  $\mathbf{E} \triangleq \text{diag}(\mathbf{M}_1, \mathbf{M}_2, \dots, \mathbf{M}_N) \in \mathbb{C}^{Nd^2 \times Nd^2}$  and  $\tilde{\mathbf{P}} \triangleq \mathbf{P} \otimes \mathbf{I}_{d^2} \in \mathbb{R}^{Nd^2 \times Nd^2}$ . For a random walk  $(v_1, \dots, v_k)$  such that  $v_1$  is sampled from an arbitrary probability distribution  $\phi$  on  $[N]$ ,  $\mathbb{E}_{v_1, \dots, v_k} \left[ \prod_{j=1}^k \mathbf{M}_{v_j} \right] = (\phi \otimes \mathbf{I}_{d^2})^{\top} \left( (\mathbf{E}\tilde{\mathbf{P}})^{k-1} \mathbf{E} \right) (\mathbf{1} \otimes \mathbf{I}_{d^2})$ , where  $\mathbf{1}$  is the all-ones vector.*

*Proof.* (of Lemma 2) We always treat  $\mathbf{E}\tilde{\mathbf{P}}$  as a block matrix, s.t.,

$$\mathbf{E}\tilde{\mathbf{P}} = \begin{bmatrix} \mathbf{M}_1 & & \\ & \ddots & \\ & & \mathbf{M}_N \end{bmatrix} \begin{bmatrix} \mathbf{P}_{1,1} \mathbf{I}_{d^2} & \cdots & \mathbf{P}_{1,N} \mathbf{I}_{d^2} \\ \vdots & \ddots & \vdots \\ \mathbf{P}_{N,1} \mathbf{I}_{d^2} & \cdots & \mathbf{P}_{N,N} \mathbf{I}_{d^2} \end{bmatrix} = \begin{bmatrix} \mathbf{P}_{1,1} \mathbf{M}_1 & \cdots & \mathbf{P}_{1,N} \mathbf{M}_1 \\ \vdots & \ddots & \vdots \\ \mathbf{P}_{N,1} \mathbf{M}_N & \cdots & \mathbf{P}_{N,N} \mathbf{M}_N \end{bmatrix}.$$

I.e., the  $(u, v)$ -th block of  $\mathbf{E}\tilde{\mathbf{P}}$ , denoted by  $(\mathbf{E}\tilde{\mathbf{P}})_{u,v}$ , is  $\mathbf{P}_{u,v}\mathbf{M}_u$ .

$$\begin{aligned}
\mathbb{E}_{v_1, \dots, v_k} \left[ \prod_{j=1}^k \mathbf{M}_{v_j} \right] &= \sum_{v_1, \dots, v_k} \phi_{v_1} \mathbf{P}_{v_1, v_2} \cdots \mathbf{P}_{v_{k-1}, v_k} \prod_{j=1}^k \mathbf{M}_{v_j} \\
&= \sum_{v_1} \phi_{v_1} \sum_{v_2} (\mathbf{P}_{v_1, v_2} \mathbf{M}_{v_1}) \cdots \sum_{v_k} (\mathbf{P}_{v_{k-1}, v_k} \mathbf{M}_{v_{k-1}}) \mathbf{M}_{v_k} \\
&= \sum_{v_1} \phi_{v_1} \sum_{v_2} (\mathbf{E}\tilde{\mathbf{P}})_{v_1, v_2} \sum_{v_3} (\mathbf{E}\tilde{\mathbf{P}})_{v_2, v_3} \cdots \sum_{v_k} (\mathbf{E}\tilde{\mathbf{P}}\mathbf{E})_{v_{k-1}, v_k} \\
&= \sum_{v_1} \phi_{v_1} \sum_{v_k} \left( (\mathbf{E}\tilde{\mathbf{P}})^{k-1} \mathbf{E} \right)_{v_1, v_k} = (\phi \otimes \mathbf{I}_{d^2})^\top \left( (\mathbf{E}\tilde{\mathbf{P}})^{k-1} \mathbf{E} \right) (\mathbf{1} \otimes \mathbf{I}_{d^2})
\end{aligned}$$

□

Given Lemma 2, Equation 8 becomes:

$$\begin{aligned}
&\mathbb{E}_{v_1, \dots, v_k} \left[ \text{Tr} \left[ \prod_{j=1}^k \exp \left( \frac{tf(v_j)(\gamma + ib)}{2} \right) \prod_{j=k}^1 \exp \left( \frac{tf(v_j)(\gamma - ib)}{2} \right) \right] \right] \\
&= \left\langle \mathbb{E}_{v_1, \dots, v_k} \left[ \prod_{j=1}^k \mathbf{M}_{v_j} \right] \text{vec}(\mathbf{I}_d), \text{vec}(\mathbf{I}_d) \right\rangle \\
&= \left\langle (\phi \otimes \mathbf{I}_{d^2})^\top \left( (\mathbf{E}\tilde{\mathbf{P}})^{k-1} \mathbf{E} \right) (\mathbf{1} \otimes \mathbf{I}_{d^2}), \text{vec}(\mathbf{I}_d) \right\rangle \\
&= \left\langle \left( (\mathbf{E}\tilde{\mathbf{P}})^{k-1} \mathbf{E} \right) (\mathbf{1} \otimes \mathbf{I}_{d^2}) \text{vec}(\mathbf{I}_d), (\phi \otimes \mathbf{I}_{d^2}) \text{vec}(\mathbf{I}_d) \right\rangle \\
&= \left\langle \left( (\mathbf{E}\tilde{\mathbf{P}})^{k-1} \mathbf{E} \right) (\mathbf{1} \otimes \text{vec}(\mathbf{I}_d)), \boldsymbol{\pi} \otimes \text{vec}(\mathbf{I}_d) \right\rangle
\end{aligned}$$

The third equality is due to  $\langle x, \mathbf{A}y \rangle = \langle \mathbf{A}^*x, y \rangle$ . The fourth equality is by setting  $\mathbf{C} = 1$  (scalar) in  $(\mathbf{A} \otimes \mathbf{B})(\mathbf{C} \otimes \mathbf{D}) = (\mathbf{A}\mathbf{C}) \otimes (\mathbf{B}\mathbf{D})$ . Then

$$\begin{aligned}
&\mathbb{E}_{v_1, \dots, v_k} \left[ \text{Tr} \left[ \prod_{j=1}^k \exp \left( \frac{tf(v_j)(\gamma + ib)}{2} \right) \prod_{j=k}^1 \exp \left( \frac{tf(v_j)(\gamma - ib)}{2} \right) \right] \right] \\
&= \left\langle \left( (\mathbf{E}\tilde{\mathbf{P}})^{k-1} \mathbf{E} \right) (\mathbf{1} \otimes \text{vec}(\mathbf{I}_d)), \phi \otimes \text{vec}(\mathbf{I}_d) \right\rangle \\
&= (\phi \otimes \text{vec}(\mathbf{I}_d))^* \left( (\mathbf{E}\tilde{\mathbf{P}})^{k-1} \mathbf{E} \right) (\mathbf{1} \otimes \text{vec}(\mathbf{I}_d)) \\
&= (\phi \otimes \text{vec}(\mathbf{I}_d))^* \left( (\mathbf{E}\tilde{\mathbf{P}})^{k-1} \mathbf{E} \right) \left( (\mathbf{P}\boldsymbol{\Pi}^{-1}\boldsymbol{\pi}) \otimes (\mathbf{I}_{d^2}\mathbf{I}_{d^2} \text{vec}(\mathbf{I}_d)) \right) \\
&= (\phi \otimes \text{vec}(\mathbf{I}_d))^* \left( \mathbf{E}\tilde{\mathbf{P}} \right)^k (\boldsymbol{\Pi}^{-1} \otimes \mathbf{I}_{d^2}) (\boldsymbol{\pi} \otimes \text{vec}(\mathbf{I}_d)) \triangleq \langle \boldsymbol{\pi} \otimes \text{vec}(\mathbf{I}_d), \mathbf{z}_k \rangle_{\boldsymbol{\pi}},
\end{aligned}$$

where we define  $\mathbf{z}_0 = \phi \otimes \text{vec}(\mathbf{I}_d)$  and  $\mathbf{z}_k = \left( \mathbf{z}_0^* \left( \mathbf{E}\tilde{\mathbf{P}} \right)^k \right)^* = \left( \mathbf{z}_{k-1}^* \mathbf{E}\tilde{\mathbf{P}} \right)^*$ . Moreover, by

Remark 2, we have  $\|\boldsymbol{\pi} \otimes \text{vec}(\mathbf{I}_d)\|_{\boldsymbol{\pi}} = \|\boldsymbol{\pi}\|_{\boldsymbol{\pi}} \|\text{vec}(\mathbf{I}_d)\|_2 = \sqrt{d}$  and  $\|\mathbf{z}_0\|_{\boldsymbol{\pi}} = \|\phi \otimes \text{vec}(\mathbf{I}_d)\|_{\boldsymbol{\pi}} = \|\phi\|_{\boldsymbol{\pi}} \|\text{vec}(\mathbf{I}_d)\|_2 = \|\phi\|_{\boldsymbol{\pi}} \sqrt{d}$

**Definition 2.** Define linear subspace  $\mathcal{U} = \left\{ \boldsymbol{\pi} \otimes \mathbf{w}, \mathbf{w} \in \mathbb{C}^{d^2} \right\}$ .

**Remark 3.**  $\{\boldsymbol{\pi} \otimes \mathbf{e}_i, i \in [d^2]\}$  is an orthonormal basis of  $\mathcal{U}$ . This is because  $\langle \boldsymbol{\pi} \otimes \mathbf{e}_i, \boldsymbol{\pi} \otimes \mathbf{e}_j \rangle_{\boldsymbol{\pi}} = \langle \boldsymbol{\pi}, \boldsymbol{\pi} \rangle_{\boldsymbol{\pi}} \langle \mathbf{e}_i, \mathbf{e}_j \rangle = \delta_{ij}$  by Remark 1, where  $\delta_{ij}$  is the Kronecker delta.

**Remark 4.** Given  $\mathbf{x} = \mathbf{y} \otimes \mathbf{w}$ . The projection of  $\mathbf{x}$  on to  $\mathcal{U}$  is  $\mathbf{x}^{\parallel} = (\mathbf{1}^* \mathbf{y})(\boldsymbol{\pi} \otimes \mathbf{w})$ . This is because

$$\mathbf{x}^{\parallel} = \sum_{i=1}^{d^2} \langle \mathbf{y} \otimes \mathbf{w}, \boldsymbol{\pi} \otimes \mathbf{e}_i \rangle_{\boldsymbol{\pi}} (\boldsymbol{\pi} \otimes \mathbf{e}_i) = \sum_{i=1}^{d^2} \langle \mathbf{y}, \boldsymbol{\pi} \rangle_{\boldsymbol{\pi}} \langle \mathbf{w}, \mathbf{e}_i \rangle (\boldsymbol{\pi} \otimes \mathbf{e}_i) = (\mathbf{1}^* \mathbf{y})(\boldsymbol{\pi} \otimes \mathbf{w}).$$

We want to bound

$$\begin{aligned}
\langle \boldsymbol{\pi} \otimes \text{vec}(\mathbf{I}_d), \mathbf{z}_k \rangle_{\boldsymbol{\pi}} &= \left\langle \boldsymbol{\pi} \otimes \text{vec}(\mathbf{I}_d), \mathbf{z}_k^{\perp} + \mathbf{z}_k^{\parallel} \right\rangle_{\boldsymbol{\pi}} = \left\langle \boldsymbol{\pi} \otimes \text{vec}(\mathbf{I}_d), \mathbf{z}_k^{\parallel} \right\rangle_{\boldsymbol{\pi}} \\
&\leq \|\boldsymbol{\pi} \otimes \text{vec}(\mathbf{I}_d)\|_{\boldsymbol{\pi}} \left\| \mathbf{z}_k^{\parallel} \right\|_{\boldsymbol{\pi}} = \sqrt{d} \left\| \mathbf{z}_k^{\parallel} \right\|_{\boldsymbol{\pi}}.
\end{aligned}$$

As  $z_k$  can be expressed as recursively applying operator  $E$  and  $\tilde{P}$  on  $z_0$ , we turn to analyze the effects of  $E$  and  $\tilde{P}$  operators.

**Definition 3.** The spectral expansion of  $\tilde{P}$  is defined as  $\lambda(\tilde{P}) \triangleq \max_{\mathbf{x} \perp \mathcal{U}, \mathbf{x} \neq 0} \frac{\|(\mathbf{x}^* \tilde{P})^*\|_{\pi}}{\|\mathbf{x}\|_{\pi}}$

**Lemma 3.**  $\lambda(P) = \lambda(\tilde{P})$ .

*Proof.* First show  $\lambda(\tilde{P}) \geq \lambda(P)$ . Suppose the maximizer of  $\lambda(P) \triangleq \max_{\mathbf{y} \perp \pi, \mathbf{y} \neq 0} \frac{\|(\mathbf{y}^* P)^*\|_{\pi}}{\|\mathbf{y}\|_{\pi}}$  is  $\mathbf{y} \in \mathbb{C}^n$ , i.e.,  $\|(\mathbf{y}^* P)^*\|_{\pi} = \lambda(P) \|\mathbf{y}\|_{\pi}$ . Construct  $\mathbf{x} = \mathbf{y} \otimes \mathbf{o}$  for arbitrary non-zero  $\mathbf{o} \in \mathbb{C}^{d^2}$ . Easy to check that  $\mathbf{x} \perp \mathcal{U}$ , because  $\langle \mathbf{x}, \pi \otimes \mathbf{w} \rangle_{\pi} = \langle \mathbf{y}, \pi \rangle_{\pi} \langle \mathbf{o}, \mathbf{w} \rangle = 0$ , where the last equality is due to  $\mathbf{y} \perp \pi$ . Then we can bound  $\|(\mathbf{x}^* \tilde{P})^*\|_{\pi}$  such that

$$\begin{aligned} \|(\mathbf{x}^* \tilde{P})^*\|_{\pi} &= \|\tilde{P}^* \mathbf{x}\|_{\pi} = \|(P^* \otimes I_{d^2})(\mathbf{y} \otimes \mathbf{o})\|_{\pi} = \|(P^* \mathbf{y}) \otimes \mathbf{o}\|_{\pi} \\ &= \|(\mathbf{y}^* P)^*\|_{\pi} \|\mathbf{o}\|_2 = \lambda(P) \|\mathbf{y}\|_{\pi} \|\mathbf{o}\|_2 = \lambda(P) \|\mathbf{x}\|_{\pi}, \end{aligned}$$

which indicate for  $\mathbf{x} = \mathbf{y} \otimes \mathbf{o}$ ,  $\frac{\|(\mathbf{x}^* \tilde{P})^*\|_{\pi}}{\|\mathbf{x}\|_{\pi}} = \lambda(P)$ . Taking maximum over all  $\mathbf{x}$  gives  $\lambda(\tilde{P}) \geq \lambda(P)$ .

Next to show  $\lambda(P) \geq \lambda(\tilde{P})$ . For  $\forall \mathbf{x} \in \mathbb{C}^{Nd^2}$  such that  $\mathbf{x} \perp \mathcal{U}$  and  $\mathbf{x} \neq 0$ , we can decompose it to be

$$\mathbf{x} = \begin{bmatrix} x_1 \\ x_2 \\ \vdots \\ x_{Nd^2} \end{bmatrix} = \begin{bmatrix} x_1 \\ x_{d^2+1} \\ \vdots \\ x_{(N-1)d^2+1} \end{bmatrix} \otimes \mathbf{e}_1 + \begin{bmatrix} x_2 \\ x_{d^2+2} \\ \vdots \\ x_{(N-1)d^2+2} \end{bmatrix} \otimes \mathbf{e}_2 + \cdots + \begin{bmatrix} x_{d^2} \\ x_{2d^2} \\ \vdots \\ x_{Nd^2} \end{bmatrix} \otimes \mathbf{e}_{d^2} \triangleq \sum_{i=1}^{d^2} \mathbf{x}_i \otimes \mathbf{e}_i,$$

where we define  $\mathbf{x}_i \triangleq [x_i \ \cdots \ x_{(N-1)d^2+i}]^{\top}$  for  $i \in [d^2]$ . We can observe that  $\mathbf{x}_i \perp \pi$ ,  $i \in [d^2]$ , because for  $\forall j \in [d^2]$ , we have

$$0 = \langle \mathbf{x}, \pi \otimes \mathbf{e}_j \rangle_{\pi} = \left\langle \sum_{i=1}^{d^2} \mathbf{x}_i \otimes \mathbf{e}_i, \pi \otimes \mathbf{e}_j \right\rangle_{\pi} = \sum_{i=1}^{d^2} \langle \mathbf{x}_i \otimes \mathbf{e}_i, \pi \otimes \mathbf{e}_j \rangle_{\pi} = \sum_{i=1}^{d^2} \langle \mathbf{x}_i, \pi \rangle_{\pi} \langle \mathbf{e}_i, \mathbf{e}_j \rangle = \langle \mathbf{x}_j, \pi \rangle_{\pi},$$

which indicates  $\mathbf{x}_j \perp \pi$ ,  $j \in [d^2]$ . Furthermore, we can also observe that  $\mathbf{x}_i \otimes \mathbf{e}_i$ ,  $i \in [d^2]$  is pairwise orthogonal. This is because for  $\forall i, j \in [d^2]$ ,  $\langle \mathbf{x}_i \otimes \mathbf{e}_i, \mathbf{x}_j \otimes \mathbf{e}_j \rangle_{\pi} = \langle \mathbf{x}_i, \mathbf{x}_j \rangle_{\pi} \langle \mathbf{e}_i, \mathbf{e}_j \rangle = \delta_{ij}$ , which suggests us to use Pythagorean theorem such that  $\|\mathbf{x}\|_{\pi}^2 = \sum_{i=1}^{d^2} \|\mathbf{x}_i \otimes \mathbf{e}_i\|_{\pi}^2 = \sum_{i=1}^{d^2} \|\mathbf{x}_i\|_{\pi} \|\mathbf{e}_i\|_2^2$ .

We can use similar way to decompose and analyze  $(\mathbf{x}^* \tilde{P})^*$ :

$$(\mathbf{x}^* \tilde{P})^* = \tilde{P}^* \mathbf{x} = \sum_{i=1}^{d^2} (P^* \otimes I_{d^2})(\mathbf{x}_i \otimes \mathbf{e}_i) = \sum_{i=1}^{d^2} (P^* \mathbf{x}_i) \otimes \mathbf{e}_i.$$

where we can observe that  $(P^* \mathbf{x}_i) \otimes \mathbf{e}_i$ ,  $i \in [d^2]$  is pairwise orthogonal. This is because for  $\forall i, j \in [d^2]$ , we have  $\langle (P^* \mathbf{x}_i) \otimes \mathbf{e}_i, (P^* \mathbf{x}_j) \otimes \mathbf{e}_j \rangle_{\pi} = \langle P^* \mathbf{x}_i, P^* \mathbf{x}_j \rangle_{\pi} \langle \mathbf{e}_i, \mathbf{e}_j \rangle = \delta_{ij}$ . Again, applying Pythagorean theorem gives:

$$\begin{aligned} \|(\mathbf{x}^* \tilde{P})^*\|_{\pi}^2 &= \sum_{i=1}^{d^2} \|(P^* \mathbf{x}_i) \otimes \mathbf{e}_i\|_{\pi}^2 = \sum_{i=1}^{d^2} \|(\mathbf{x}_i^* P)^*\|_{\pi}^2 \|\mathbf{e}_i\|_2^2 \\ &\leq \sum_{i=1}^{d^2} \lambda(P)^2 \|\mathbf{x}_i\|_{\pi}^2 \|\mathbf{e}_i\|_2^2 = \lambda(P)^2 \left( \sum_{i=1}^{d^2} \|\mathbf{x}_i\|_{\pi}^2 \|\mathbf{e}_i\|_2^2 \right) = \lambda(P)^2 \|\mathbf{x}\|_{\pi}^2, \end{aligned}$$

which indicate that for  $\forall \mathbf{x}$  such that  $\mathbf{x} \perp \mathcal{U}$  and  $\mathbf{x} \neq 0$ , we have  $\frac{\|(\mathbf{x}^* \tilde{P})^*\|_{\pi}}{\|\mathbf{x}\|_{\pi}} \leq \lambda(P)$ , or equivalently  $\lambda(\tilde{P}) \leq \lambda(P)$ .

Overall, we have shown both  $\lambda(\tilde{P}) \geq \lambda(P)$  and  $\lambda(\tilde{P}) \leq \lambda(P)$ . We conclude  $\lambda(\tilde{P}) = \lambda(P)$ .  $\square$



**Lemma 4. (The effect of  $\tilde{P}$  operator)** This lemma is a generalization of lemma 3.3 in [6].

1.  $\forall \mathbf{y} \in \mathcal{U}$ , then  $(\mathbf{y}^* \tilde{P})^* = \mathbf{y}$ .
2.  $\forall \mathbf{y} \perp \mathcal{U}$ , then  $(\mathbf{y}^* \tilde{P})^* \perp \mathcal{U}$ , and  $\left\| (\mathbf{y}^* \tilde{P})^* \right\|_{\pi} \leq \lambda \|\mathbf{y}\|_{\pi}$ .

*Proof.* First prove the Part 1 of lemma 4.  $\forall \mathbf{y} = \boldsymbol{\pi} \otimes \mathbf{w} \in \mathcal{U}$ :

$$\mathbf{y}^* \tilde{P} = (\boldsymbol{\pi}^* \otimes \mathbf{w}^*) (\mathbf{P} \otimes \mathbf{I}_{d^2}) = (\boldsymbol{\pi}^* \mathbf{P}) \otimes (\mathbf{w}^* \mathbf{I}_{d^2}) = \boldsymbol{\pi}^* \otimes \mathbf{w}^* = \mathbf{y}^*,$$

where third equality is because  $\boldsymbol{\pi}$  is the stationary distribution. Next to prove Part 2 of lemma 4. Given  $\mathbf{y} \perp \mathcal{U}$ , want to show  $(\mathbf{y}^* \tilde{P})^* \perp \boldsymbol{\pi} \otimes \mathbf{w}$ , for every  $\mathbf{w} \in \mathbb{C}^{d^2}$ . It is true because

$$\begin{aligned} \left\langle \boldsymbol{\pi} \otimes \mathbf{w}, (\mathbf{y}^* \tilde{P})^* \right\rangle_{\pi} &= \mathbf{y}^* \tilde{P} (\boldsymbol{\Pi}^{-1} \otimes \mathbf{I}_{d^2}) (\boldsymbol{\pi} \otimes \mathbf{w}) = \mathbf{y}^* ((\mathbf{P} \boldsymbol{\Pi}^{-1} \boldsymbol{\pi}) \otimes \mathbf{w}) = \mathbf{y}^* ((\boldsymbol{\Pi}^{-1} \boldsymbol{\pi}) \otimes \mathbf{w}) \\ &= \mathbf{y}^* (\boldsymbol{\Pi}^{-1} \otimes \mathbf{I}_{d^2}) (\boldsymbol{\pi} \otimes \mathbf{w}) = \langle \boldsymbol{\pi} \otimes \mathbf{w}, \mathbf{y} \rangle_{\pi} = 0. \end{aligned}$$

The third equality is due to  $\mathbf{P} \boldsymbol{\Pi}^{-1} \boldsymbol{\pi} = \mathbf{P} \mathbf{1} = \mathbf{1} = \boldsymbol{\Pi}^{-1} \boldsymbol{\pi}$ . Moreover,  $\left\| (\mathbf{y}^* \tilde{P})^* \right\|_{\pi} \leq \lambda \|\mathbf{y}\|_{\pi}$  is simply a re-statement of definition 3.  $\square$

**Remark 5.** Lemma 4 implies that  $\forall \mathbf{y} \in \mathbb{C}^{nd^2}$

1.  $\left\| (\mathbf{y}^* \tilde{P})^* \right\| = \left\| (\mathbf{y}^{\parallel*} \tilde{P})^* \right\| + \left\| (\mathbf{y}^{\perp*} \tilde{P})^* \right\| = \mathbf{y}^{\parallel} + \mathbf{0} = \mathbf{y}^{\parallel}$
2.  $\left\| (\mathbf{y}^* \tilde{P})^* \right\|^{\perp} = \left\| (\mathbf{y}^{\parallel*} \tilde{P})^* \right\|^{\perp} + \left\| (\mathbf{y}^{\perp*} \tilde{P})^* \right\|^{\perp} = \mathbf{0} + (\mathbf{y}^{\perp*} \tilde{P})^* = (\mathbf{y}^{\perp*} \tilde{P})^*$ .

**Lemma 5. (The effect of  $E$  operator)** Given three parameters  $\lambda \in [0, 1]$ ,  $\ell \geq 0$  and  $t > 0$ . Let  $\mathbf{P}$  be a regular Markov chain on state space  $[N]$ , with stationary distribution  $\boldsymbol{\pi}$  and spectral expansion  $\lambda$ . Suppose each state  $i \in [N]$  is assigned a matrix  $\mathbf{H}_i \in \mathbb{C}^{d^2 \times d^2}$  s.t.  $\|\mathbf{H}_i\|_2 \leq \ell$  and  $\sum_{i \in [N]} \pi_i \mathbf{H}_i = \mathbf{0}$ . Let  $\tilde{P} = \mathbf{P} \otimes \mathbf{I}_{d^2}$  and  $E$  denotes the  $Nd^2 \times Nd^2$  block matrix where the  $i$ -th diagonal block is the matrix  $\exp(t\mathbf{H}_i)$ , i.e.,  $E = \text{diag}(\exp(t\mathbf{H}_1), \dots, \exp(t\mathbf{H}_N))$ . Then for any  $\forall \mathbf{z} \in \mathbb{C}^{Nd^2}$ , we have:

1.  $\left\| \left( (\mathbf{z}^{\parallel*} E \tilde{P})^* \right) \right\|_{\pi} \leq \alpha_1 \|\mathbf{z}^{\parallel}\|_{\pi}$ , where  $\alpha_1 = \exp(t\ell) - t\ell$ .
2.  $\left\| \left( (\mathbf{z}^{\parallel*} E \tilde{P})^* \right) \right\|_{\pi}^{\perp} \leq \alpha_2 \|\mathbf{z}^{\parallel}\|_{\pi}$ , where  $\alpha_2 = \lambda(\exp(t\ell) - 1)$ .
3.  $\left\| \left( (\mathbf{z}^{\perp*} E \tilde{P})^* \right) \right\|_{\pi} \leq \alpha_3 \|\mathbf{z}^{\perp}\|_{\pi}$ , where  $\alpha_3 = \exp(t\ell) - 1$ .
4.  $\left\| \left( (\mathbf{z}^{\perp*} E \tilde{P})^* \right) \right\|_{\pi}^{\perp} \leq \alpha_4 \|\mathbf{z}^{\perp}\|_{\pi}$ , where  $\alpha_4 = \lambda \exp(t\ell)$ .

*Proof.* (of Lemma 5) We first show that, for  $\mathbf{z} = \mathbf{y} \otimes \mathbf{w}$ ,

$$\begin{aligned} (\mathbf{z}^* E)^* = E^* \mathbf{z} &= \begin{bmatrix} \exp(t\mathbf{H}_1^*) & & \\ & \ddots & \\ & & \exp(t\mathbf{H}_N^*) \end{bmatrix} \begin{bmatrix} y_1 \mathbf{w} \\ \vdots \\ y_N \mathbf{w} \end{bmatrix} = \begin{bmatrix} y_1 \exp(t\mathbf{H}_1^*) \mathbf{w} \\ \vdots \\ y_N \exp(t\mathbf{H}_N^*) \mathbf{w} \end{bmatrix} \\ &= \begin{bmatrix} y_1 \exp(t\mathbf{H}_1^*) \mathbf{w} \\ \vdots \\ 0 \end{bmatrix} + \dots + \begin{bmatrix} 0 \\ \vdots \\ y_N \exp(t\mathbf{H}_N^*) \mathbf{w} \end{bmatrix} = \sum_{i=1}^N y_i (\mathbf{e}_i \otimes (\exp(t\mathbf{H}_i^*) \mathbf{w})). \end{aligned}$$

Due to the linearity of projection,

$$\left( (z^* E)^* \right)^\parallel = \sum_{i=1}^N y_i (e_i \otimes (\exp(tH_i^*) w))^\parallel = \sum_{i=1}^N y_i (\mathbf{1}^* e_i) (\pi \otimes (\exp(tH_i^*) w)) = \pi \otimes \left( \sum_{i=1}^N y_i \exp(tH_i^*) w \right), \quad (9)$$

where the second inequality follows by Remark 4.

**Proof of Lemma 5, Part 1** Firstly We can bound  $\left\| \sum_{i=1}^N \pi_i \exp(tH_i^*) \right\|_2$  by

$$\begin{aligned} \left\| \sum_{i=1}^N \pi_i \exp(tH_i^*) \right\|_2 &= \left\| \sum_{i=1}^N \pi_i \exp(tH_i) \right\|_2 = \left\| \sum_{i=1}^N \pi_i \sum_{k=0}^{+\infty} \frac{t^k H_i^k}{k!} \right\|_2 = \left\| \mathbf{I} + \sum_{i=1}^N \pi_i \sum_{j=2}^{+\infty} \frac{t^j H_i^j}{j!} \right\|_2 \\ &\leq 1 + \sum_{i=1}^N \pi_i \sum_{j=2}^{+\infty} \frac{t^j \|H_i\|_2^j}{j!} \leq 1 + \sum_{i=1}^N \pi_i \sum_{j=2}^{+\infty} \frac{(t\ell)^j}{j!} = \exp(t\ell) - t\ell, \end{aligned}$$

where the first step follows by  $\|A\|_2 = \|A^*\|_2$ , the second step follows by matrix exponential, the third step follows by  $\sum_{i \in [N]} \pi_i H_i = 0$ , and the fourth step follows by triangle inequality. Given the above bound, for any  $z^\parallel$  which can be written as  $z^\parallel = \pi \otimes w$  for some  $w \in \mathbb{C}^{d^2}$ , we have

$$\begin{aligned} \left\| \left( (z^* E \tilde{P})^* \right)^\parallel \right\|_\pi &= \left\| \left( (z^* E)^* \right)^\parallel \right\|_\pi = \left\| \pi \otimes \left( \sum_{i=1}^N \pi_i \exp(tH_i^*) w \right) \right\|_\pi = \|\pi\|_\pi \left\| \sum_{i=1}^N \pi_i \exp(tH_i^*) w \right\|_2 \\ &\leq \|\pi\|_\pi \left\| \sum_{i=1}^N \pi_i \exp(tH_i^*) \right\|_2 \|w\|_2 = \left\| \sum_{i=1}^N \pi_i \exp(tH_i^*) \right\|_2 \|z^\parallel\|_\pi \\ &\leq (\exp(t\ell) - t\ell) \|z^\parallel\|_\pi, \end{aligned}$$

where step one follows by Part 1 of Remark 5 and step two follows by Equation 9.

**Proof of Lemma 5, Part 2** For  $\forall z \in \mathbb{C}^{Nd^2}$ , we can write it as block matrix such that:

$$z = \begin{bmatrix} z_1 \\ \vdots \\ z_N \end{bmatrix} = \begin{bmatrix} z_1 \\ \vdots \\ 0 \end{bmatrix} + \cdots + \begin{bmatrix} 0 \\ \vdots \\ z_N \end{bmatrix} = \sum_{i=1}^N e_i \otimes z_i,$$

where each  $z_i \in \mathbb{C}^{d^2}$ . Please note that above decomposition is pairwise orthogonal. Applying Pythagorean theorem gives  $\|z\|_\pi^2 = \sum_{i=1}^N \|e_i \otimes z_i\|_\pi^2 = \sum_{i=1}^N \|e_i\|_\pi^2 \|z_i\|_2^2$ . Similarly, we can decompose  $(E^* - I_{Nd^2})z$  such that

$$\begin{aligned} (E^* - I_{Nd^2})z &= \begin{bmatrix} \exp(tH_1^*) - I_{d^2} & & \\ & \ddots & \\ & & \exp(tH_N^*) - I_{d^2} \end{bmatrix} \begin{bmatrix} z_1 \\ \vdots \\ z_N \end{bmatrix} = \begin{bmatrix} (\exp(tH_1^*) - I_{d^2})z_1 \\ \vdots \\ (\exp(tH_N^*) - I_{d^2})z_N \end{bmatrix} \\ &= \begin{bmatrix} (\exp(tH_1^*) - I_{d^2})z_1 \\ \vdots \\ 0 \end{bmatrix} + \cdots + \begin{bmatrix} 0 \\ \vdots \\ (\exp(tH_N^*) - I_{d^2})z_N \end{bmatrix} \quad (10) \\ &= \sum_{i=1}^N e_i \otimes ((\exp(tH_i^*) - I_{d^2})z_i). \end{aligned}$$

Note that above decomposition is pairwise orthogonal, too. Applying Pythagorean theorem gives

$$\begin{aligned} \|(E^* - I_{Nd^2})z\|_\pi^2 &= \sum_{i=1}^N \|e_i \otimes ((\exp(tH_i^*) - I_{d^2})z_i)\|_\pi^2 = \sum_{i=1}^N \|e_i\|_\pi^2 \|(\exp(tH_i^*) - I_{d^2})z_i\|_2^2 \\ &\leq \sum_{i=1}^N \|e_i\|_\pi^2 \|\exp(tH_i^*) - I_{d^2}\|_2^2 \|z_i\|_2^2 \leq \max_{i \in [N]} \|\exp(tH_i^*) - I_{d^2}\|_2^2 \sum_{i=1}^N \|e_i\|_\pi^2 \|z_i\|_2^2 \\ &= \max_{i \in [N]} \|\exp(tH_i^*) - I_{d^2}\|_2^2 \|z\|_\pi^2 = \max_{i \in [N]} \|\exp(tH_i) - I_{d^2}\|_2^2 \|z\|_\pi^2, \end{aligned}$$

which indicates

$$\begin{aligned} \|(\mathbf{E}^* - \mathbf{I}_{Nd^2})\mathbf{z}\|_\pi &= \max_{i \in [N]} \|\exp(t\mathbf{H}_i) - \mathbf{I}_{d^2}\|_2 \|\mathbf{z}\|_\pi = \max_{i \in [N]} \left\| \sum_{j=1}^{+\infty} \frac{t^j \mathbf{H}_i^j}{j!} \right\|_2 \|\mathbf{z}\|_\pi \\ &\leq \left( \sum_{j=1}^{+\infty} \frac{t^j \ell^j}{j!} \right) \|\mathbf{z}\|_\pi = (\exp(t\ell) - 1) \|\mathbf{z}\|_\pi. \end{aligned}$$

Now we can formally prove Part 2 of Lemma 5 by:

$$\begin{aligned} \left\| \left( (\mathbf{z}^\parallel * \mathbf{E}\tilde{\mathbf{P}})^* \right)^\perp \right\|_\pi &= \left\| \left( (\mathbf{E}^* \mathbf{z}^\parallel)^{\perp *} \tilde{\mathbf{P}} \right)^* \right\|_\pi \leq \lambda \left\| (\mathbf{E}^* \mathbf{z}^\parallel)^\perp \right\|_\pi = \lambda \left\| (\mathbf{E}^* \mathbf{z}^\parallel - \mathbf{z}^\parallel + \mathbf{z}^\parallel)^\perp \right\|_\pi \\ &= \lambda \left\| (\mathbf{E}^* - \mathbf{I}_{Nd^2}) \mathbf{z}^\parallel \right\|_\pi \leq \lambda \left\| (\mathbf{E}^* - \mathbf{I}_{Nd^2}) \mathbf{z} \right\|_\pi \leq \lambda (\exp(t\ell) - 1) \|\mathbf{z}\|_\pi. \end{aligned}$$

The first step follows by Part 2 of Remark 5, the second step follows by Part 1 on Lemma 4 and the forth step is due to  $(\mathbf{z}^\parallel)^\perp = \mathbf{0}$ .

**Proof of Lemma 5, Part 3** Note that

$$\begin{aligned} \left\| \left( (\mathbf{z}^\perp * \mathbf{E}\tilde{\mathbf{P}})^* \right)^\parallel \right\|_\pi &= \left\| (\mathbf{E}^* \mathbf{z}^\perp)^\parallel \right\|_\pi = \left\| (\mathbf{E}^* \mathbf{z}^\perp - \mathbf{z}^\perp + \mathbf{z}^\perp)^\parallel \right\|_\pi = \left\| (\mathbf{E}^* - \mathbf{I}_{Nd^2}) \mathbf{z}^\perp \right\|_\pi \\ &\leq \left\| (\mathbf{E}^* - \mathbf{I}_{Nd^2}) \mathbf{z}^\perp \right\|_\pi \leq (\exp(t\ell) - 1) \|\mathbf{z}^\perp\|_\pi, \end{aligned}$$

where the first step follows by Part 1 of Remark 5, the third step follows by  $(\mathbf{z}^\perp)^\parallel = \mathbf{0}$ , and the last step follows by Part 2 of Lemma 4.

**Proof of Lemma 5, Part 4** Simiar to Equation 10, for  $\forall \mathbf{z} \in \mathbb{C}^{Nd^2}$ , we can decompose  $\mathbf{E}^* \mathbf{z}$  as  $\mathbf{E}^* \mathbf{z} = \sum_{i=1}^N \mathbf{e}_i \otimes (\exp(t\mathbf{H}_i^*) \mathbf{z}_i)$ . This decomposition is pairwise orthogonal, too. Applying Pythagorean theorem gives

$$\begin{aligned} \|\mathbf{E}^* \mathbf{z}\|_\pi^2 &= \sum_{i=1}^N \|\mathbf{e}_i \otimes (\exp(t\mathbf{H}_i^*) \mathbf{z}_i)\|_\pi^2 = \sum_{i=1}^N \|\mathbf{e}_i\|_\pi^2 \|\exp(t\mathbf{H}_i^*) \mathbf{z}_i\|_2^2 \leq \sum_{i=1}^N \|\mathbf{e}_i\|_\pi^2 \|\exp(t\mathbf{H}_i^*)\|_2^2 \|\mathbf{z}_i\|_2^2 \\ &\leq \max_{i \in [N]} \|\exp(t\mathbf{H}_i^*)\|_2^2 \sum_{i=1}^N \|\mathbf{e}_i\|_\pi^2 \|\mathbf{z}_i\|_2^2 \leq \max_{i \in [N]} \exp(\|\mathbf{H}_i\|_2) \|\mathbf{z}\|_\pi^2 \leq \exp(t\ell) \|\mathbf{z}\|_\pi^2 \end{aligned}$$

which indicates  $\|\mathbf{E}^* \mathbf{z}\|_\pi \leq \exp(t\ell) \|\mathbf{z}\|_\pi$ . Now we can prove Part 4 of Lemma 5: Note that

$$\left\| \left( (\mathbf{z}^\perp * \mathbf{E}\tilde{\mathbf{P}})^* \right)^\perp \right\|_\pi = \left\| \left( (\mathbf{E}^* \mathbf{z}^\perp)^{\perp *} \tilde{\mathbf{P}} \right)^* \right\|_\pi \leq \lambda \left\| (\mathbf{E}^* \mathbf{z}^\perp)^\perp \right\|_\pi \leq \lambda \|\mathbf{E}^* \mathbf{z}^\perp\|_\pi \leq \lambda \exp(t\ell) \|\mathbf{z}^\perp\|_\pi. \quad \square$$

**Recursive Analysis** We now use Lemma 5 to analyze the evolution of  $\mathbf{z}_i^\parallel$  and  $\mathbf{z}_i^\perp$ . Let  $\mathbf{H}_v \triangleq \frac{f(v)(\gamma+ib)}{2} \otimes \mathbf{I}_{d^2} + \mathbf{I}_{d^2} \otimes \frac{f(v)(\gamma-ib)}{2}$  in Lemma 5. We can see verify the following three facts: (1)  $\exp(t\mathbf{H}_v) = \mathbf{M}_v$ ; (2)  $\|\mathbf{H}_v\|_2$  is bounded (3)  $\sum_{v \in [N]} \pi_v \mathbf{H}_v = \mathbf{0}$ .

Firstly, easy to see that

$$\begin{aligned} \exp(t\mathbf{H}_v) &= \exp\left(\frac{tf(v)(\gamma+ib)}{2} \otimes \mathbf{I}_{d^2} + \mathbf{I}_{d^2} \otimes \frac{tf(v)(\gamma-ib)}{2}\right) \\ &= \exp\left(\frac{tf(v)(\gamma+ib)}{2}\right) \otimes \exp\left(\frac{tf(v)(\gamma-ib)}{2}\right) = \mathbf{M}_v, \end{aligned}$$

where the first step follows by definition of  $\mathbf{H}_i$  and the second step follows by the fact that  $\exp(\mathbf{A} \otimes \mathbf{I}_d + \mathbf{I}_d \otimes \mathbf{B}) = \exp(\mathbf{A}) \otimes \exp(\mathbf{B})$ , and the last step follows by Equation 7.

Secondly, we can bound  $\|\mathbf{H}_v\|_2$  by:

$$\begin{aligned} \|\mathbf{H}_v\|_2 &\leq \left\| \frac{f(v)(\gamma+ib)}{2} \otimes \mathbf{I}_{d^2} \right\|_2 + \left\| \mathbf{I}_{d^2} \otimes \frac{f(v)(\gamma-ib)}{2} \right\|_2 \\ &= \left\| \frac{f(v)(\gamma+ib)}{2} \right\|_2 \|\mathbf{I}_{d^2}\|_2 + \|\mathbf{I}_{d^2}\|_2 \left\| \frac{f(v)(\gamma-ib)}{2} \right\|_2 \leq \sqrt{\gamma^2 + b^2}, \end{aligned}$$

where the first step follows by triangle inequality, the second step follows by the fact that  $\|\mathbf{A} \otimes \mathbf{B}\|_2 = \|\mathbf{A}\|_2 \|\mathbf{B}\|_2$ , the third step follows by  $\|\mathbf{I}_d\|_2 = 1$  and  $\|f(v)\|_2 \leq 1$ . We set  $\ell = \sqrt{\gamma^2 + b^2}$  to satisfy the assumption in Lemma 5 that  $\|\mathbf{H}_v\|_2 \leq \ell$ . According to the conditions in Lemma 1, we know that  $t\ell \leq 1$  and  $t\ell \leq \frac{1-\lambda}{4\lambda}$ .

Finally, we show that  $\sum_{v \in [N]} \pi_v \mathbf{H}_v = 0$ , because

$$\begin{aligned} \sum_{v \in [N]} \pi_v \mathbf{H}_v &= \sum_{v \in [N]} \left( \frac{f(v)(\gamma + ib)}{2} \otimes \mathbf{I}_{d^2} + \mathbf{I}_{d^2} \otimes \frac{f(v)(\gamma - ib)}{2} \right) \\ &= \frac{\gamma + ib}{2} \left( \sum_{v \in [N]} \pi_v f(v) \right) \otimes \mathbf{I}_d + \frac{\gamma - ib}{2} \mathbf{I}_d \otimes \left( \sum_{v \in [N]} \pi_v f(v) \right) = 0, \end{aligned}$$

where the last step follows by  $\sum_{v \in [N]} \pi_v f(v) = 0$ .

**Claim 4.**  $\|z_i^\perp\|_\pi \leq \frac{\alpha_2}{1-\alpha_4} \max_{0 \leq j < i} \|z_j^\parallel\|_\pi$ .

*Proof.* Using Part 2 and Part 4 of Lemma 5, we have

$$\begin{aligned} \|z_i^\perp\|_\pi &= \left\| \left( (z_{i-1}^* \mathbf{E} \tilde{\mathbf{P}})^* \right)^\perp \right\|_\pi \\ &\leq \left\| \left( (z_{i-1}^\parallel \mathbf{E} \tilde{\mathbf{P}})^* \right)^\perp \right\|_\pi + \left\| \left( (z_{i-1}^\perp \mathbf{E} \tilde{\mathbf{P}})^* \right)^\perp \right\|_\pi \\ &\leq \alpha_2 \|z_{i-1}^\parallel\|_\pi + \alpha_4 \|z_{i-1}^\perp\|_\pi \\ &\leq (\alpha_2 + \alpha_2 \alpha_4 + \alpha_2 \alpha_4^2 + \dots) \max_{0 \leq j < i} \|z_j^\parallel\|_\pi \\ &\leq \frac{\alpha_2}{1-\alpha_4} \max_{0 \leq j < i} \|z_j^\parallel\|_\pi \end{aligned}$$

□

**Claim 5.**  $\|z_i^\parallel\|_\pi \leq \left( \alpha_1 + \frac{\alpha_2 \alpha_3}{1-\alpha_4} \right) \max_{0 \leq j < i} \|z_j^\parallel\|_\pi$ .

*Proof.* Using Part 1 and Part 3 of Lemma 5 as well as Claim 4, we have

$$\begin{aligned} \|z_i^\parallel\|_\pi &= \left\| \left( (z_{i-1}^* \mathbf{E} \tilde{\mathbf{P}})^* \right)^\parallel \right\|_\pi \\ &\leq \left\| \left( (z_{i-1}^\parallel \mathbf{E} \tilde{\mathbf{P}})^* \right)^\parallel \right\|_\pi + \left\| \left( (z_{i-1}^\perp \mathbf{E} \tilde{\mathbf{P}})^* \right)^\parallel \right\|_\pi \\ &\leq \alpha_1 \|z_{i-1}^\parallel\|_\pi + \alpha_3 \|z_{i-1}^\perp\|_\pi \\ &\leq \alpha_1 \|z_{i-1}^\parallel\|_\pi + \alpha_3 \frac{\alpha_2}{1-\alpha_4} \max_{0 \leq j < i-1} \|z_j^\parallel\|_\pi \\ &\leq \left( \alpha_1 + \frac{\alpha_2 \alpha_3}{1-\alpha_4} \right) \max_{0 \leq j < i} \|z_j^\parallel\|_\pi. \end{aligned}$$

□

Combining Claim 4 and Claim 5 gives

$$\begin{aligned} \|z_k^\parallel\|_\pi &\leq \left( \alpha_1 + \frac{\alpha_2 \alpha_3}{1-\alpha_4} \right) \max_{0 \leq j < k} \|z_j^\parallel\|_\pi \\ (\text{because } \alpha_1 + \alpha_2 \alpha_3 / (1-\alpha_4) &\geq \alpha_1 \geq 1) &\leq \left( \alpha_1 + \frac{\alpha_2 \alpha_3}{1-\alpha_4} \right)^k \|z_0^\parallel\|_\pi \\ &= \|\phi\|_\pi \sqrt{d} \left( \alpha_1 + \frac{\alpha_2 \alpha_3}{1-\alpha_4} \right)^k, \end{aligned}$$

which implies

$$\langle \boldsymbol{\pi} \otimes \text{vec}(\mathbf{I}_d), \mathbf{z}_k \rangle_{\boldsymbol{\pi}} \leq \|\boldsymbol{\phi}\|_{\boldsymbol{\pi}} d \left( \alpha_1 + \frac{\alpha_2 \alpha_3}{1 - \alpha_4} \right)^k.$$

Finally, we bound  $\left( \alpha_1 + \frac{\alpha_2 \alpha_3}{1 - \alpha_4} \right)^k$ . The same as [10], we can bound  $\alpha_1, \alpha_2 \alpha_3, \alpha_4$  by:

$$\alpha_1 = \exp(t\ell) - t\ell \leq 1 + t^2 \ell^2 = 1 + t^2(\gamma^2 + b^2),$$

and

$$\alpha_2 \alpha_3 = \lambda(\exp(t\ell) - 1)^2 \leq \lambda(2t\ell)^2 = 4\lambda t^2(\gamma^2 + b^2)$$

where the second step is because  $\exp(x) \leq 1 + 2x, \forall x \in [0, 1]$  and  $t\ell < 1$ ,

$$\alpha_4 = \lambda \exp(t\ell) \leq \lambda(1 + 2t\ell) \leq \frac{1}{2} + \frac{1}{2}\lambda$$

where the second step is because  $t\ell < 1$ , and the third step follows by  $t\ell \leq \frac{1-\lambda}{4\lambda}$ .

Overall, we have

$$\begin{aligned} \left( \alpha_1 + \frac{\alpha_2 \alpha_3}{1 - \alpha_4} \right)^k &\leq \left( 1 + t^2(\gamma^2 + b^2) + \frac{4\lambda t^2(\gamma^2 + b^2)}{\frac{1}{2} - \frac{1}{2}\lambda} \right)^k \\ &\leq \exp \left( kt^2(\gamma^2 + b^2) \left( 1 + \frac{8}{1 - \lambda} \right) \right). \end{aligned}$$

This completes our proof of Lemma 1.  $\square$

#### B.4 Proof of Theorem 1

**Theorem 1** (Markov Chain Matrix Chernoff Bound). *Let  $\mathbf{P}$  be a regular Markov chain with state space  $[N]$ , stationary distribution  $\boldsymbol{\pi}$  and spectral expansion  $\lambda$ . Let  $f : [N] \rightarrow \mathbb{C}^{d \times d}$  be a function such that (1)  $\forall v \in [N]$ ,  $f(v)$  is Hermitian and  $\|f(v)\|_2 \leq 1$ ; (2)  $\sum_{v \in [N]} \pi_v f(v) = 0$ . Let  $(v_1, \dots, v_k)$  denote a  $k$ -step random walk on  $\mathbf{P}$  starting from a distribution  $\boldsymbol{\phi}$ . Given  $\epsilon \in (0, 1)$ ,*

$$\begin{aligned} \mathbb{P} \left[ \lambda_{\max} \left( \frac{1}{k} \sum_{j=1}^k f(v_j) \right) \geq \epsilon \right] &\leq 4 \|\boldsymbol{\phi}\|_{\boldsymbol{\pi}} d^2 \exp(-(\epsilon^2(1 - \lambda)k/72)) \\ \mathbb{P} \left[ \lambda_{\min} \left( \frac{1}{k} \sum_{j=1}^k f(v_j) \right) \leq -\epsilon \right] &\leq 4 \|\boldsymbol{\phi}\|_{\boldsymbol{\pi}} d^2 \exp(-(\epsilon^2(1 - \lambda)k/72)). \end{aligned}$$

*Proof.* (of Theorem 1) Our strategy is to adopt complexification technique [8]. For any  $d \times d$  complex Hermitian matrix  $\mathbf{X}$ , we may write  $\mathbf{X} = \mathbf{Y} + i\mathbf{Z}$ , where  $\mathbf{Y}$  and  $i\mathbf{Z}$  are the real and imaginary parts of  $\mathbf{X}$ , respectively. Moreover, the Hermitian property of  $\mathbf{X}$  (i.e.,  $\mathbf{X}^* = \mathbf{X}$ ) implies that (1)  $\mathbf{Y}$  is real and symmetric (i.e.,  $\mathbf{Y}^\top = \mathbf{Y}$ ); (2)  $\mathbf{Z}$  is real and skew symmetric (i.e.,  $\mathbf{Z} = -\mathbf{Z}^\top$ ). The eigenvalues of  $\mathbf{X}$  can be found via a  $2d \times 2d$  real symmetric matrix  $\mathbf{H} \triangleq \begin{bmatrix} \mathbf{Y} & \mathbf{Z} \\ -\mathbf{Z} & \mathbf{Y} \end{bmatrix}$ , where the symmetry of  $\mathbf{H}$  follows by the symmetry of  $\mathbf{Y}$  and skew-symmetry of  $\mathbf{Z}$ . Note the fact that, if the eigenvalues (real) of  $\mathbf{X}$  are  $\lambda_1, \lambda_2, \dots, \lambda_d$ , then those of  $\mathbf{H}$  are  $\lambda_1, \lambda_1, \lambda_2, \lambda_2, \dots, \lambda_d, \lambda_d$ . I.e.,  $\mathbf{X}$  and  $\mathbf{H}$  have the same eigenvalues, but with different multiplicity.

Using the above technique, we can formally prove Theorem 1. For any complex matrix function  $f : [N] \rightarrow \mathbb{C}^{d \times d}$  in Theorem 1, we can separate its real and imaginary parts by  $f = f_1 + i f_2$ . Then we construct a real-valued matrix function  $g : [N] \rightarrow \mathbb{R}^{2d \times 2d}$  s.t.  $\forall v \in [N], g(v) = \begin{bmatrix} f_1(v) & f_2(v) \\ -f_2(v) & f_1(v) \end{bmatrix}$ . According to the complexification technique, we know that (1)  $\forall v \in [N], g(v)$  is real symmetric and  $\|g(v)\|_2 = \|f(v)\|_2 \leq 1$ ; (2)  $\sum_{v \in [N]} \pi_v g(v) = 0$ . Then

$$\mathbb{P} \left[ \lambda_{\max} \left( \frac{1}{k} \sum_{j=1}^k f(v_j) \right) \geq \epsilon \right] = \mathbb{P} \left[ \lambda_{\max} \left( \frac{1}{k} \sum_{j=1}^k g(v_j) \right) \geq \epsilon \right] \leq 4 \|\boldsymbol{\phi}\|_{\boldsymbol{\pi}} d^2 \exp(-(\epsilon^2(1 - \lambda)k/72)),$$

where the first step follows by the fact that  $\frac{1}{k} \sum_{j=1}^k f(v_j)$  and  $\frac{1}{k} \sum_{j=1}^k g(v_j)$  have the same eigenvalues (with different multiplicity), and the second step follows by Theorem 3.<sup>5</sup> The bound on  $\lambda_{\min}$  also follows similarly.  $\square$

<sup>5</sup>The additional factor 4 is because the constructed  $g(v)$  has shape  $2d \times 2d$ .
